# Supplementary material for: The causal effect of Alzheimer’s disease and family history of Alzheimer’s disease on non-ischemic cardiomyopathy and left ventricular structure and function: a Mendelian randomization study
Source: Front Genet. 2024 Jun 5;15:1379865. doi: 10.3389/fgene.2024.1379865 (PMC11188370; doi:10.3389/fgene.2024.1379865)
Supplement: Supplementary file 1 [file Table2.XLSX]

## Sheet: Tables captions and titles
title	caption
Table S1	Specific information on SNPs used as instrumental variables regarding the causal effect of Alzheimer's disease on non-ischemic cardiomyopathy.
Table S2	Specific information on SNPs used as instrumental variables regarding the causal effect of Alzheimer's disease on dilated cardiomyopathy.
Table S3	Specific information on SNPs used as instrumental variables regarding the causal effect of Alzheimer's disease (different dataset) on dilated cardiomyopathy.
Table S4	Specific information on SNPs for the family history of Alzheimer's disease sets.
Table S5	Specific information on SNPs used as instrumental variables regarding the causal effect of Alzheimer's disease on left ventricular (LV) remodeling index.
Table S6	Mendelian Randomization estimation for Alzheimer's disease on cardiomyopathy.
Table S7	Mendelian Randomization estimation for family history of Alzheimer's disease on cardiomyopathy.
Table S8	Mendelian Randomization estimation for Alzheimer's disease on left ventricular structure and function.

## Sheet: Table S1
Table S1. Specific information on SNPs used as instrumental variables regarding the causal effect of Alzheimer's disease on non-ischemic cardiomyopathy.
Alzheimer's disease
SNP	Chr	Pos	Effect Allele	Other allele	Beta	Se	P	F	R2
rs1065712	8	11702122	C	G	0.1081	0.0185	5.46e-09	34.1435
rs10792832	11	85867875	G	A	0.1056	0.0084	6.33e-36	158.041
rs10933431	2	233981912	C	G	0.0852	0.0099	1.04e-17	74.0643
rs11218343	11	121435587	C	T	-0.1654	0.0214	1.01e-14	59.737
rs112481437	19	45549135	A	G	0.2935	0.0278	4.86e-26	111.462
rs113706587	5	179628150	A	G	0.0925	0.0133	3.38e-12	48.3705
rs1140239	16	30021402	T	C	-0.0592	0.0086	4.61e-12	47.3856
rs11495981	7	28177301	T	C	-0.0561	0.01	2.1e-08	31.4721
rs117310449	19	45393516	T	C	0.7701	0.0338	3.26e-115	519.112
rs117618017	15	63569902	T	C	0.113	0.0119	1.75e-21	90.1702
rs11769559	7	143111296	C	T	-0.0695	0.0085	4e-16	66.8547
rs12151021	19	1050874	G	A	-0.1055	0.0093	4.09e-30	128.688
rs12444183	16	81773209	G	A	0.0591	0.0084	2.21e-12	49.5013
rs12590654	14	92938855	A	G	-0.0693	0.0087	2.08e-15	63.4495
rs143332484	6	41129207	T	C	0.3346	0.0376	6.04e-19	79.1911
rs148601586	19	45346666	G	C	0.6483	0.0366	2.72e-70	313.754
rs149080927	19	1854253	GC	G	-0.0535	0.0092	6.14e-09	33.8168
rs1532276	8	27466157	C	T	0.1003	0.0083	2.15e-33	146.031
rs1582763	11	60021948	A	G	-0.086	0.0084	1.65e-24	104.819
rs1693551	8	101675584	C	T	0.0459	0.0081	1.79e-08	32.1111
rs17125924	14	53391680	G	A	0.0881	0.0142	5.82e-10	38.4924
rs1799777	9	107666035	GC	G	0.0708	0.0123	9.54e-09	33.1327
rs190651665	19	45456103	G	T	-0.1598	0.026	8.37e-10	37.7752
rs199451	17	44801784	A	G	-0.0594	0.01	2.62e-09	35.2836
rs2070901	1	161185058	T	G	-0.0527	0.0092	1.2e-08	32.813
rs2154481	21	27473875	T	C	0.05	0.0082	1.02e-09	37.1802
rs2526377	17	56410041	G	A	-0.0452	0.0082	4.11e-08	30.3843
rs2830489	21	28148191	T	C	-0.0547	0.0091	1.72e-09	36.132
rs28577986	14	106200232	A	G	0.0698	0.0111	3.38e-10	39.5426
rs34173062	8	145158607	A	G	0.1139	0.0163	2.93e-12	48.8284
rs365653	19	45361646	G	A	-0.256	0.0146	1.85e-68	307.45
rs3822030	4	987343	T	G	0.0514	0.0083	5.04e-10	38.3504
rs4292	17	61554341	T	C	0.0688	0.0084	3.47e-16	67.0839
rs4485362	16	81975831	G	T	-0.0463	0.0083	2e-08	31.1176
rs4714447	6	41239822	T	C	0.0578	0.0086	1.73e-11	45.1709
rs4734295	8	96000919	G	A	0.0487	0.0081	1.98e-09	36.1483
rs57402520	17	5139807	A	G	0.0905	0.0126	6.59e-13	51.5889
rs5848	17	42430244	T	C	0.0646	0.0092	1.76e-12	49.3048
rs593742	15	59045774	G	A	-0.061	0.009	1.04e-11	45.9383
rs6014724	20	54998544	G	A	-0.1176	0.0145	4.84e-16	65.7777
rs61679753	19	45400747	A	T	-0.5412	0.028	2.28e-83	373.594
rs61762319	3	154801978	G	A	0.143	0.0255	2.14e-08	31.4479
rs62375397	5	86298531	T	C	0.0746	0.01	8.58e-14	55.6516
rs6586028	10	82253984	T	C	0.0791	0.0103	1.33e-14	58.9764
rs6656401	1	207692049	G	A	-0.1253	0.0104	2.84e-33	145.156
rs6733839	2	127892810	T	C	0.1686	0.0084	6.48e-90	402.862
rs6846529	4	11025131	T	C	-0.0673	0.0091	1.25e-13	54.695
rs7068231	10	61784928	G	T	0.0487	0.0084	6.79e-09	33.6124
rs7384878	7	99932049	T	C	0.0775	0.0089	2.13e-18	75.8269
rs74504435	7	54949256	G	A	-0.0842	0.0141	2.05e-09	35.6604
rs74685827	11	121353077	G	T	0.1964	0.0303	8.63e-11	42.0144
rs74745468	14	39887676	A	G	0.0822	0.0145	1.4e-08	32.1372
rs755951	8	27226790	C	A	0.0618	0.0083	7.04e-14	55.4397
rs7912495	10	11718713	G	A	0.0572	0.0082	2.87e-12	48.6591
rs9676738	19	45704771	A	G	0.1689	0.0228	1.24e-13	54.8769
rs976271	6	114682727	A	G	0.0467	0.0084	3.23e-08	30.9083
									0.0101515
SNP: single-nucleotide polymorphism; Chr: chromosome; Pos: position.

## Sheet: Table S2
Table S2. Specific information on SNPs used as instrumental variables regarding the causal effect of Alzheimer's disease on dilated cardiomyopathy.
Alzheimer's disease
SNP	Chr	Pos	Effect Allele	Other allele	Beta	Se	P	F	R2
rs1065712	8	11702122	C	G	0.1081	0.0185	5.46198e-09	34.1435
rs10792832	11	85867875	G	A	0.1056	0.0084	6.33432e-36	158.041
rs10933431	2	233981912	C	G	0.0852	0.0099	1.04304e-17	74.0643
rs11218343	11	121435587	C	T	-0.1654	0.0214	1.00995e-14	59.737
rs112481437	19	45549135	A	G	0.2935	0.0278	4.86295e-26	111.462
rs113706587	5	179628150	A	G	0.0925	0.0133	3.37987e-12	48.3705
rs1140239	16	30021402	T	C	-0.0592	0.0086	4.61318e-12	47.3856
rs11495981	7	28177301	T	C	-0.0561	0.01	2.10499e-08	31.4721
rs11500477	11	47409051	A	T	0.0585	0.0084	3.27718e-12	48.5013
rs117310449	19	45393516	T	C	0.7701	0.0338	3.25837e-115	519.112
rs117618017	15	63569902	T	C	0.113	0.0119	1.74582e-21	90.1702
rs11769559	7	143111296	C	T	-0.0695	0.0085	3.99669e-16	66.8547
rs12151021	19	1050874	G	A	-0.1055	0.0093	4.08884e-30	128.688
rs12444183	16	81773209	G	A	0.0591	0.0084	2.20699e-12	49.5013
rs12590654	14	92938855	A	G	-0.0693	0.0087	2.07683e-15	63.4495
rs1385742	6	47595155	T	A	-0.0624	0.0086	4.68598e-13	52.6468
rs143332484	6	41129207	T	C	0.3346	0.0376	6.03532e-19	79.1911
rs148601586	19	45346666	G	C	0.6483	0.0366	2.72396e-70	313.754
rs149080927	19	1854253	GC	G	-0.0535	0.0092	6.14299e-09	33.8168
rs1532276	8	27466157	C	T	0.1003	0.0083	2.14882e-33	146.031
rs1582763	11	60021948	A	G	-0.086	0.0084	1.65386e-24	104.819
rs1693551	8	101675584	C	T	0.0459	0.0081	1.78501e-08	32.1111
rs17125924	14	53391680	G	A	0.0881	0.0142	5.81902e-10	38.4924
rs1799777	9	107666035	GC	G	0.0708	0.0123	9.53806e-09	33.1327
rs190651665	19	45456103	G	T	-0.1598	0.026	8.37105e-10	37.7752
rs199451	17	44801784	A	G	-0.0594	0.01	2.62301e-09	35.2836
rs2070901	1	161185058	T	G	-0.0527	0.0092	1.196e-08	32.813
rs2154481	21	27473875	T	C	0.05	0.0082	1.017e-09	37.1802
rs2526377	17	56410041	G	A	-0.0452	0.0082	4.10696e-08	30.3843
rs2830489	21	28148191	T	C	-0.0547	0.0091	1.71799e-09	36.132
rs28577986	14	106200232	A	G	0.0698	0.0111	3.38003e-10	39.5426
rs34173062	8	145158607	A	G	0.1139	0.0163	2.93427e-12	48.8284
rs35472547	6	32560370	T	G	-0.0954	0.0113	4.26481e-17	71.2754
rs365653	19	45361646	G	A	-0.256	0.0146	1.84799e-68	307.45
rs3822030	4	987343	T	G	0.0514	0.0083	5.03605e-10	38.3504
rs4292	17	61554341	T	C	0.0688	0.0084	3.47376e-16	67.0839
rs4485362	16	81975831	G	T	-0.0463	0.0083	1.99701e-08	31.1176
rs4714447	6	41239822	T	C	0.0578	0.0086	1.72902e-11	45.1709
rs4734295	8	96000919	G	A	0.0487	0.0081	1.97501e-09	36.1483
rs57402520	17	5139807	A	G	0.0905	0.0126	6.58567e-13	51.5889
rs5848	17	42430244	T	C	0.0646	0.0092	1.7559e-12	49.3048
rs593742	15	59045774	G	A	-0.061	0.009	1.04208e-11	45.9383
rs6014724	20	54998544	G	A	-0.1176	0.0145	4.83727e-16	65.7777
rs61679753	19	45400747	A	T	-0.5412	0.028	2.27877e-83	373.594
rs61762319	3	154801978	G	A	0.143	0.0255	2.142e-08	31.4479
rs62375397	5	86298531	T	C	0.0746	0.01	8.57828e-14	55.6516
rs6586028	10	82253984	T	C	0.0791	0.0103	1.32892e-14	58.9764
rs6656401	1	207692049	G	A	-0.1253	0.0104	2.83727e-33	145.156
rs6733839	2	127892810	T	C	0.1686	0.0084	6.48037e-90	402.862
rs6846529	4	11025131	T	C	-0.0673	0.0091	1.25199e-13	54.695
rs7068231	10	61784928	G	T	0.0487	0.0084	6.78907e-09	33.6124
rs7384878	7	99932049	T	C	0.0775	0.0089	2.13304e-18	75.8269
rs74504435	7	54949256	G	A	-0.0842	0.0141	2.04602e-09	35.6604
rs74685827	11	121353077	G	T	0.1964	0.0303	8.6278e-11	42.0144
rs74745468	14	39887676	A	G	0.0822	0.0145	1.39601e-08	32.1372
rs755951	8	27226790	C	A	0.0618	0.0083	7.04044e-14	55.4397
rs7912495	10	11718713	G	A	0.0572	0.0082	2.86616e-12	48.6591
rs9676738	19	45704771	A	G	0.1689	0.0228	1.24394e-13	54.8769
rs976271	6	114682727	A	G	0.0467	0.0084	3.23497e-08	30.9083
									0.0102595
SNP: single-nucleotide polymorphism; Chr: chromosome; Pos: position.

## Sheet: Table S3
Table S3. Specific information on SNPs used as instrumental variables regarding the causal effect of Alzheimer's disease (different dataset) on dilated cardiomyopathy.
Alzheimer's disease
SNP	Chr	Pos	Effect Allele	Other allele	Beta	Se	P	F	R2
rs1081105	19	45412955	C	A	0.942	0.0436	1.51e-103	466.798
rs111278137	19	45215081	A	G	-0.4735	0.0713	3.2e-11	44.1023
rs11767557	7	143109139	C	T	-0.1028	0.0182	1.56e-08	31.9039
rs12151021	19	1050874	G	A	-0.1071	0.0169	2.56e-10	40.1611
rs12590654	14	92938855	A	G	-0.0906	0.0157	8.73e-09	33.301
rs147711004	19	45337918	A	G	1.1354	0.0366	1e-200	962.356
rs150685845	19	45675180	G	A	0.5561	0.0645	6.62e-18	74.3338
rs1582763	11	60021948	A	G	-0.1232	0.0149	1.19e-16	68.3674
rs34665982	6	32560306	C	T	-0.0967	0.0166	5.8e-09	33.9341
rs3740688	11	47380340	T	G	0.0935	0.0144	9.7e-11	42.1598
rs3851179	11	85868640	C	T	0.1198	0.0148	5.81e-16	65.5225
rs6733839	2	127892810	T	C	0.1693	0.0154	4.02e-28	120.857
rs679515	1	207750568	C	T	-0.1508	0.0183	1.55e-16	67.9048
rs72654445	19	45417200	A	G	-0.5425	0.0811	2.27e-11	44.7464
rs73223431	8	27219987	T	C	0.0936	0.0153	8.34e-10	37.4256
rs7412	19	45412079	T	C	-0.4673	0.0305	6.4e-53	234.743
rs867230	8	27468503	A	C	0.1333	0.0158	3.49e-17	71.1781
rs9381563	6	47432637	T	C	-0.0821	0.0148	2.93e-08	30.7725
									0.007044
SNP: single-nucleotide polymorphism; Chr: chromosome; Pos: position.

## Sheet: Table S4
Table S4. Specific information on SNPs for the family history of Alzheimer's disease sets.
Paternal history of Alzheimer's disease
SNP	Chr	Pos	Effect Allele	Other allele	Beta	Se	P	F	R2
rs2972558	19	45356141	T	C	0.127479	0.0171168	9.50605e-14	55.4667
rs429358	19	45411941	C	T	0.522828	0.0155726	1e-200	1127.19
rs6733839	2	127892810	T	C	0.0936903	0.0167948	2.42549e-08	31.12
									0.00464465
Maternal history of Alzheimer's disease
SNP	Chr	Pos	Effect Allele	Other allele	Beta	Se	P	F	R2
rs2965169	19	45251156	C	A	-0.105649	0.0125295	3.39625e-17	71.099
rs429358	19	45411941	C	T	0.592698	0.0113009	1e-200	2750.69
rs56394238	19	45335676	G	A	0.135228	0.012301	4.12098e-28	120.852
rs6733839	2	127892810	T	C	0.115619	0.0122573	3.99945e-21	88.9752
									0.0104116
SNP: single-nucleotide polymorphism; Chr: chromosome; Pos: position.

## Sheet: Table S5
Table S5. Specific information on SNPs used as instrumental variables regarding the causal effect of Alzheimer's disease on left ventricular (LV) remodeling index.
Alzheimer's disease
SNP	Chr	Pos	Effect Allele	Other allele	Beta	Se	P	F	R2
rs1065712	8	11702122	C	G	0.1081	0.0185	5.46198e-09	34.1435
rs10792832	11	85867875	G	A	0.1056	0.0084	6.33432e-36	158.041
rs10933431	2	233981912	C	G	0.0852	0.0099	1.04304e-17	74.0643
rs11218343	11	121435587	C	T	-0.1654	0.0214	1.00995e-14	59.737
rs112481437	19	45549135	A	G	0.2935	0.0278	4.86295e-26	111.462
rs113706587	5	179628150	A	G	0.0925	0.0133	3.37987e-12	48.3705
rs1140239	16	30021402	T	C	-0.0592	0.0086	4.61318e-12	47.3856
rs11495981	7	28177301	T	C	-0.0561	0.01	2.10499e-08	31.4721
rs11500477	11	47409051	A	T	0.0585	0.0084	3.27718e-12	48.5013
rs117310449	19	45393516	T	C	0.7701	0.0338	3.25837e-115	519.112
rs117618017	15	63569902	T	C	0.113	0.0119	1.74582e-21	90.1702
rs11769559	7	143111296	C	T	-0.0695	0.0085	3.99669e-16	66.8547
rs12151021	19	1050874	G	A	-0.1055	0.0093	4.08884e-30	128.688
rs12444183	16	81773209	G	A	0.0591	0.0084	2.20699e-12	49.5013
rs12590654	14	92938855	A	G	-0.0693	0.0087	2.07683e-15	63.4495
rs148601586	19	45346666	G	C	0.6483	0.0366	2.72396e-70	313.754
rs149080927	19	1854253	GC	G	-0.0535	0.0092	6.14299e-09	33.8168
rs1532276	8	27466157	C	T	0.1003	0.0083	2.14882e-33	146.031
rs1582763	11	60021948	A	G	-0.086	0.0084	1.65386e-24	104.819
rs1693551	8	101675584	C	T	0.0459	0.0081	1.78501e-08	32.1111
rs17125924	14	53391680	G	A	0.0881	0.0142	5.81902e-10	38.4924
rs1799777	9	107666035	GC	G	0.0708	0.0123	9.53806e-09	33.1327
rs190651665	19	45456103	G	T	-0.1598	0.026	8.37105e-10	37.7752
rs199451	17	44801784	A	G	-0.0594	0.01	2.62301e-09	35.2836
rs2070901	1	161185058	T	G	-0.0527	0.0092	1.196e-08	32.813
rs2154481	21	27473875	T	C	0.05	0.0082	1.017e-09	37.1802
rs2526377	17	56410041	G	A	-0.0452	0.0082	4.10696e-08	30.3843
rs2830489	21	28148191	T	C	-0.0547	0.0091	1.71799e-09	36.132
rs28577986	14	106200232	A	G	0.0698	0.0111	3.38003e-10	39.5426
rs34173062	8	145158607	A	G	0.1139	0.0163	2.93427e-12	48.8284
rs35472547	6	32560370	T	G	-0.0954	0.0113	4.26481e-17	71.2754
rs365653	19	45361646	G	A	-0.256	0.0146	1.84799e-68	307.45
rs3822030	4	987343	T	G	0.0514	0.0083	5.03605e-10	38.3504
rs4292	17	61554341	T	C	0.0688	0.0084	3.47376e-16	67.0839
rs4485362	16	81975831	G	T	-0.0463	0.0083	1.99701e-08	31.1176
rs4714447	6	41239822	T	C	0.0578	0.0086	1.72902e-11	45.1709
rs4734295	8	96000919	G	A	0.0487	0.0081	1.97501e-09	36.1483
rs57402520	17	5139807	A	G	0.0905	0.0126	6.58567e-13	51.5889
rs5848	17	42430244	T	C	0.0646	0.0092	1.7559e-12	49.3048
rs593742	15	59045774	G	A	-0.061	0.009	1.04208e-11	45.9383
rs6014724	20	54998544	G	A	-0.1176	0.0145	4.83727e-16	65.7777
rs61679753	19	45400747	A	T	-0.5412	0.028	2.27877e-83	373.594
rs61762319	3	154801978	G	A	0.143	0.0255	2.142e-08	31.4479
rs62375397	5	86298531	T	C	0.0746	0.01	8.57828e-14	55.6516
rs6586028	10	82253984	T	C	0.0791	0.0103	1.32892e-14	58.9764
rs6656401	1	207692049	G	A	-0.1253	0.0104	2.83727e-33	145.156
rs6733839	2	127892810	T	C	0.1686	0.0084	6.48037e-90	402.862
rs6846529	4	11025131	T	C	-0.0673	0.0091	1.25199e-13	54.695
rs7068231	10	61784928	G	T	0.0487	0.0084	6.78907e-09	33.6124
rs7384878	7	99932049	T	C	0.0775	0.0089	2.13304e-18	75.8269
rs74504435	7	54949256	G	A	-0.0842	0.0141	2.04602e-09	35.6604
rs74685827	11	121353077	G	T	0.1964	0.0303	8.6278e-11	42.0144
rs74745468	14	39887676	A	G	0.0822	0.0145	1.39601e-08	32.1372
rs755951	8	27226790	C	A	0.0618	0.0083	7.04044e-14	55.4397
rs7912495	10	11718713	G	A	0.0572	0.0082	2.86616e-12	48.6591
rs9676738	19	45704771	A	G	0.1689	0.0228	1.24394e-13	54.8769
rs976271	6	114682727	A	G	0.0467	0.0084	3.23497e-08	30.9083
									0.0580938
SNP: single-nucleotide polymorphism; Chr: chromosome; Pos: position.

## Sheet: Table S6
Table S6. Mendelian Randomization estimation for Alzheimer's disease on cardiomyopathy.
Exposure	Outcome	method	nsnp	b	se	pval	lo_ci	up_ci	or	or_lci95	or_uci95
Alzheimer's disease	Non-ischemic cardiomyopathy	Inverse variance weighted	56	-0.0719656	0.0270605	0.00782716	-0.125004	-0.0189271	0.930563	0.882493	0.981251
Alzheimer's disease	Non-ischemic cardiomyopathy	MR Egger	56	-0.0712052	0.0491793	0.153435	-0.167597	0.0251861	0.931271	0.845695	1.02551
Alzheimer's disease	Non-ischemic cardiomyopathy	Weighted median	56	-0.0657649	0.0401374	0.101318	-0.144434	0.0129043	0.936351	0.865512	1.01299
Alzheimer's disease	Dilated cardiomyopathy	Inverse variance weighted	59	-0.143101	0.0568974	0.0119008	-0.25462	-0.0315822	0.866666	0.775211	0.968911
Alzheimer's disease	Dilated cardiomyopathy	MR Egger	59	-0.236534	0.0998027	0.0211944	-0.432147	-0.0409207	0.789359	0.649114	0.959905
Alzheimer's disease	Dilated cardiomyopathy	Weighted median	59	-0.192329	0.0859467	0.0252361	-0.360784	-0.0238733	0.825036	0.697129	0.976409
Alzheimer's disease	Hypertrophic cardiomyopathy	Inverse variance weighted	56	0.0458161	0.116985	0.695322	-0.183474	0.275106	1.04688	0.832374	1.31667
Alzheimer's disease	Hypertrophic cardiomyopathy	MR Egger	56	0.308207	0.209862	0.147738	-0.103122	0.719535	1.36098	0.902017	2.05348
Alzheimer's disease	Hypertrophic cardiomyopathy	Weighted median	56	0.217226	0.174909	0.214262	-0.125597	0.560048	1.24262	0.88197	1.75076
Alzheimer's disease(different dataset)	Non-ischemic cardiomyopathy	Inverse variance weighted	18	-0.0393245	0.0226319	0.0822863	-0.083683	0.00503396	0.961439	0.919723	1.00505
Alzheimer's disease(different dataset)	Non-ischemic cardiomyopathy	MR Egger	18	-0.053319	0.0314422	0.109296	-0.114946	0.00830778	0.948078	0.891414	1.00834
Alzheimer's disease(different dataset)	Non-ischemic cardiomyopathy	Weighted median	18	-0.0645181	0.0280674	0.021523	-0.11953	-0.00950594	0.937519	0.887337	0.990539
Alzheimer's disease(different dataset)	Dilated cardiomyopathy	Inverse variance weighted	18	-0.10511	0.049522	0.0337957	-0.202174	-0.00804738	0.900225	0.816953	0.991985
Alzheimer's disease(different dataset)	Dilated cardiomyopathy	MR Egger	18	-0.101199	0.069933	0.167183	-0.238267	0.03587	0.903753	0.787992	1.03652
Alzheimer's disease(different dataset)	Dilated cardiomyopathy	Weighted median	18	-0.109629	0.0658303	0.0958462	-0.238657	0.0193979	0.896166	0.787685	1.01959
Alzheimer's disease(different dataset)	Hypertrophic cardiomyopathy	Inverse variance weighted	18	-0.0153406	0.0972579	0.874669	-0.205966	0.175285	0.984777	0.813861	1.19159
Alzheimer's disease(different dataset)	Hypertrophic cardiomyopathy	MR Egger	18	0.0290858	0.135353	0.832569	-0.236207	0.294378	1.02951	0.789617	1.34229
Alzheimer's disease(different dataset)	Hypertrophic cardiomyopathy	Weighted median	18	0.0628083	0.119469	0.599077	-0.171351	0.296967	1.06482	0.842526	1.34577

## Sheet: Table S7
Table S7. Mendelian Randomization estimation for family history of Alzheimer's disease on cardiomyopathy.
Exposure	Outcome	method	nsnp	b	se	pval	lo_ci	up_ci	or	or_lci95	or_uci95
Paternal history of Alzheimer's disease	Non-ischemic cardiomyopathy	Inverse variance weighted	3	-0.113839	0.0349726	0.00113354	-0.182385	-0.0452928	0.892402	0.83328	0.955718
Paternal history of Alzheimer's disease	Non-ischemic cardiomyopathy	MR Egger	3	-0.120095	0.0542805	0.270245	-0.226485	-0.0137051	0.886836	0.797332	0.986388
Paternal history of Alzheimer's disease	Non-ischemic cardiomyopathy	Weighted median	3	-0.115261	0.0356191	0.00121242	-0.185075	-0.0454479	0.891133	0.831042	0.955569
Paternal history of Alzheimer's disease	Dilated cardiomyopathy	Inverse variance weighted	3	-0.0273814	0.144301	0.849504	-0.310212	0.255449	0.97299	0.733291	1.29104
Paternal history of Alzheimer's disease	Dilated cardiomyopathy	MR Egger	3	-0.113633	0.292701	0.764253	-0.687327	0.460062	0.892586	0.502918	1.58417
Paternal history of Alzheimer's disease	Dilated cardiomyopathy	Weighted median	3	-0.0494701	0.0861505	0.565813	-0.218325	0.119385	0.951734	0.803864	1.1268
Paternal history of Alzheimer's disease	Hypertrophic cardiomyopathy	Inverse variance weighted	3	-0.0533653	0.213038	0.802204	-0.47092	0.36419	0.948034	0.624427	1.43935
Paternal history of Alzheimer's disease	Hypertrophic cardiomyopathy	MR Egger	3	0.0770088	0.436385	0.888801	-0.778306	0.932324	1.08005	0.459183	2.54041
Paternal history of Alzheimer's disease	Hypertrophic cardiomyopathy	Weighted median	3	-0.0150812	0.142607	0.915778	-0.29459	0.264428	0.985032	0.744837	1.30269
Maternal history of Alzheimer's disease	Non-ischemic cardiomyopathy	Inverse variance weighted	4	-0.11006	0.0298615	0.000228097	-0.168588	-0.0515312	0.895781	0.844857	0.949774
Maternal history of Alzheimer's disease	Non-ischemic cardiomyopathy	MR Egger	4	-0.0908403	0.0448691	0.180201	-0.178784	-0.00289691	0.913164	0.836287	0.997107
Maternal history of Alzheimer's disease	Non-ischemic cardiomyopathy	Weighted median	4	-0.105384	0.0314074	0.000792522	-0.166943	-0.0438257	0.899979	0.846248	0.957121
Maternal history of Alzheimer's disease	Dilated cardiomyopathy	Inverse variance weighted	4	-0.0808603	0.145935	0.57952	-0.366892	0.205172	0.922323	0.692884	1.22774
Maternal history of Alzheimer's disease	Dilated cardiomyopathy	MR Egger	4	-0.0015621	0.25742	0.995709	-0.506105	0.502981	0.998439	0.602839	1.65364
Maternal history of Alzheimer's disease	Dilated cardiomyopathy	Weighted median	4	-0.0699178	0.0772188	0.365227	-0.221267	0.0814311	0.93247	0.801503	1.08484
Maternal history of Alzheimer's disease	Hypertrophic cardiomyopathy	Inverse variance weighted	4	-0.0365511	0.12152	0.763581	-0.274731	0.201629	0.964109	0.759777	1.22339
Maternal history of Alzheimer's disease	Hypertrophic cardiomyopathy	MR Egger	4	0.0508152	0.18264	0.806965	-0.307159	0.40879	1.05213	0.735533	1.505
Maternal history of Alzheimer's disease	Hypertrophic cardiomyopathy	Weighted median	4	-0.0198745	0.131466	0.879836	-0.277547	0.237798	0.980322	0.75764	1.26845

## Sheet: Table S8
Table S8. Mendelian Randomization estimation for Alzheimer's disease on left ventricular structure and function.
Exposure	Outcome	method	nsnp	b	se	pval	lo_ci	up_ci	or	or_lci95	or_uci95
Alzheimer's disease	LVEDV	Inverse variance weighted	58	0.247301	0.438605	0.572867	-0.612366	1.10697	1.28056	0.542067	3.02517
Alzheimer's disease	LVEDV	MR Egger	58	0.746888	0.775196	0.339447	-0.772495	2.26627	2.11042	0.461859	9.64339
Alzheimer's disease	LVEDV	Weighted median	58	0.152691	0.590066	0.795813	-1.00384	1.30922	1.16497	0.36647	3.70329
Alzheimer's disease	LVESV	Inverse variance weighted	58	-0.129315	0.24481	0.597342	-0.609142	0.350512	0.878697	0.543817	1.41979
Alzheimer's disease	LVESV	MR Egger	58	-0.037074	0.43478	0.93235	-0.889243	0.815095	0.963605	0.410967	2.25939
Alzheimer's disease	LVESV	Weighted median	58	0.294905	0.350926	0.400705	-0.392909	0.98272	1.343	0.67509	2.67171
Alzheimer's disease	LVEF	Inverse variance weighted	58	0.164077	0.0968385	0.0902021	-0.0257269	0.35388	1.1783	0.974601	1.42458
Alzheimer's disease	LVEF	MR Egger	58	0.250537	0.170585	0.147511	-0.0838092	0.584883	1.28472	0.919607	1.79478
Alzheimer's disease	LVEF	Weighted median	58	0.104206	0.15363	0.497587	-0.196909	0.40532	1.10983	0.821265	1.49978
Alzheimer's disease	LVM	Inverse variance weighted	58	-0.319619	0.238873	0.180886	-0.78781	0.148571	0.726425	0.45484	1.16017
Alzheimer's disease	LVM	MR Egger	58	-0.0437637	0.422182	0.917809	-0.871241	0.783713	0.95718	0.418432	2.18959
Alzheimer's disease	LVM	Weighted median	58	-0.257211	0.317218	0.417461	-0.878957	0.364536	0.773205	0.415216	1.43985
Alzheimer's disease	LVMVR	Inverse variance weighted	57	-0.00312279	0.00147079	0.033736	-0.00600553	-0.000240051	0.996882	0.994012	0.99976
Alzheimer's disease	LVMVR	MR Egger	57	-0.00223966	0.00259625	0.392075	-0.0073283	0.00284899	0.997763	0.992699	1.00285
Alzheimer's disease	LVMVR	Weighted median	57	-0.00377421	0.00188103	0.0448069	-0.00746102	-8.7397e-05	0.996233	0.992567	0.999913
